# Supplementary figures and images for: Climate Anomalies and Spillover of Bat-Borne Viral Diseases in the Asia–Pacific Region and the Arabian Peninsula
Source: MDPI journal article supplement (doi:10.3390/v14051100), 2022-05-20

# Land Surface Temperature Anomaly

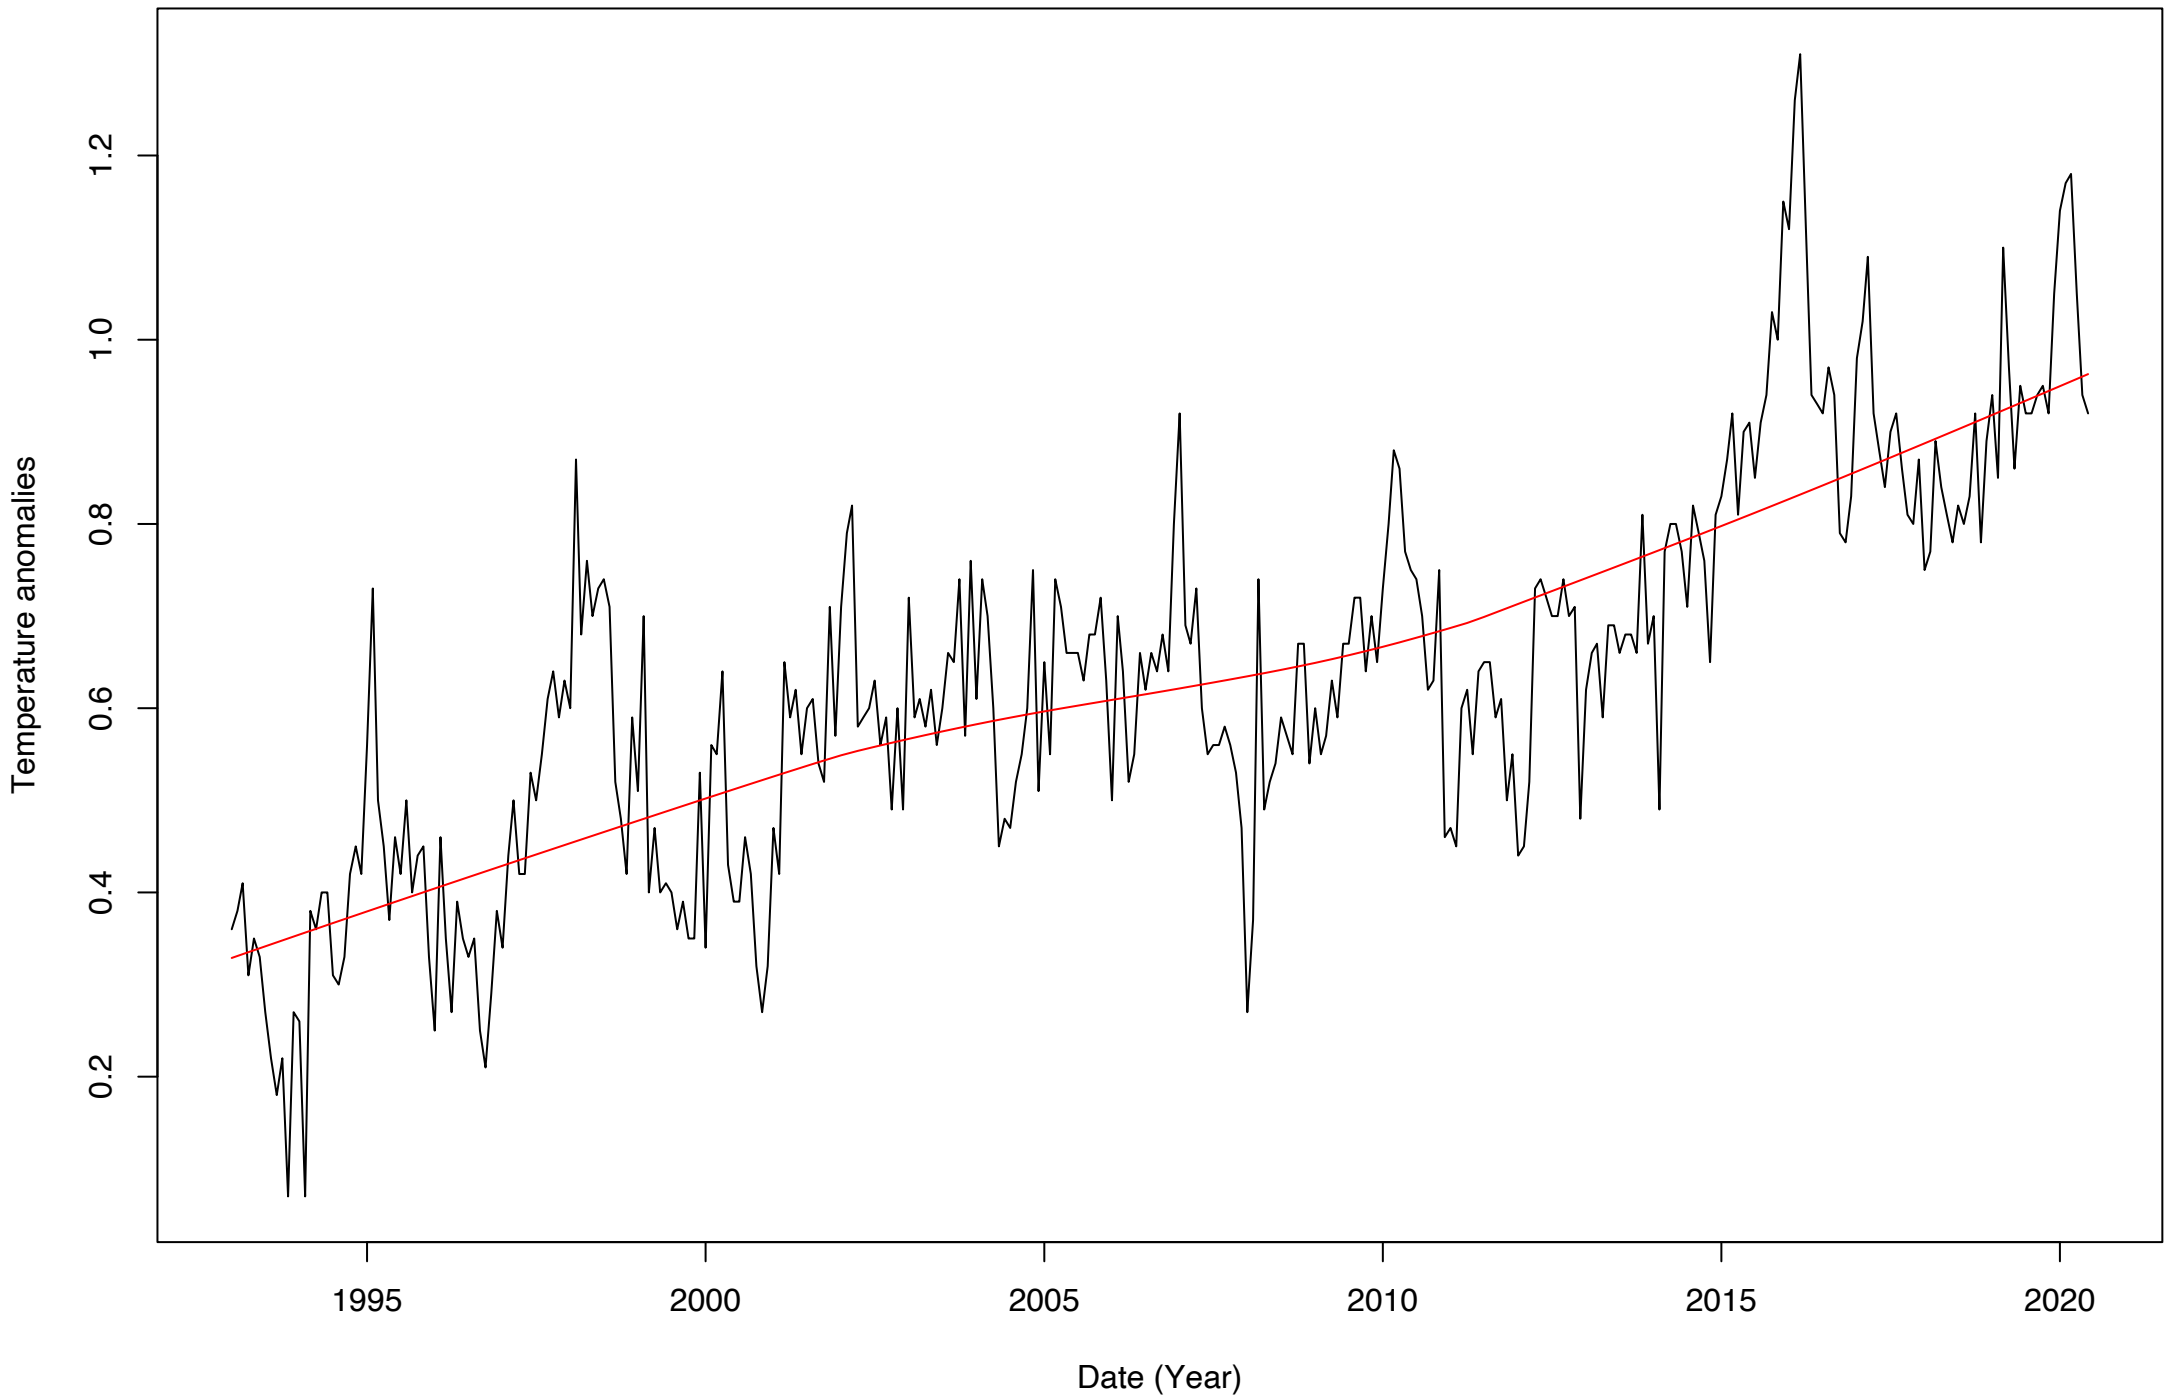

Supplement: s1 [file s1]
